# Supplementary material
Source: PubMed Central journal article supplement (PMC3119111)
Supplement: supp_00409.2010_fig.pdf [file supp_00409.2010_fig.pdf]

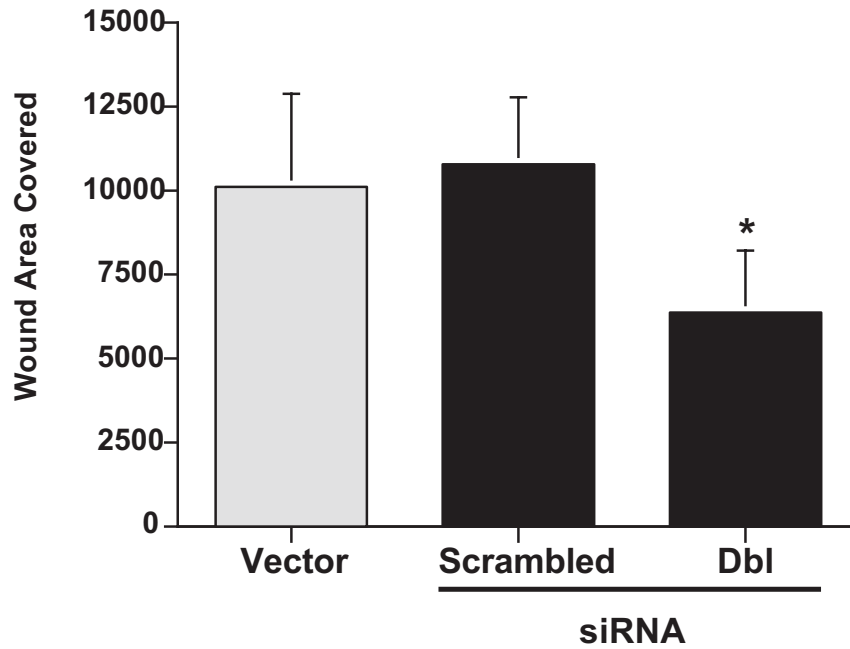

**Fig.S1** IEC-6 cells were transfected with empty vector (MiR-LacZ), Scrambled- and Dbl- siRNA. Blasticidin resistant clones were selected and migration was measured by wound healing assay as described in methods. Values are mean  $\pm$  SEM of triplicates. \*, Significantly different compared to vector and scrambled-siRNA transfected groups.
